# Supplementary material for: Oxalobacter formigenes-associated host features and microbial community structures examined using the American Gut Project
Source: PubMed Central journal article supplement (PMC5571629; doi:10.1186/s40168-017-0316-0), 2017-08-25

# Suppl. Fig 2.

A

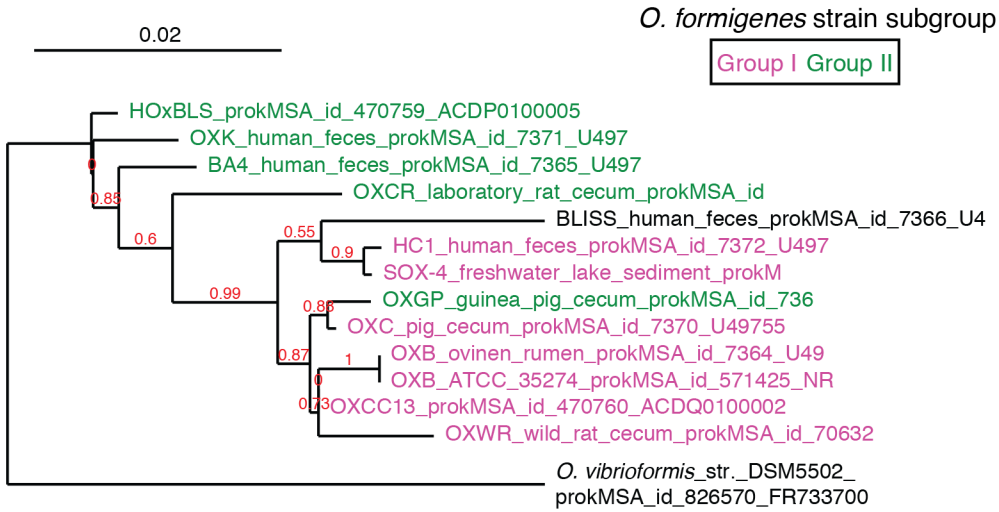

B

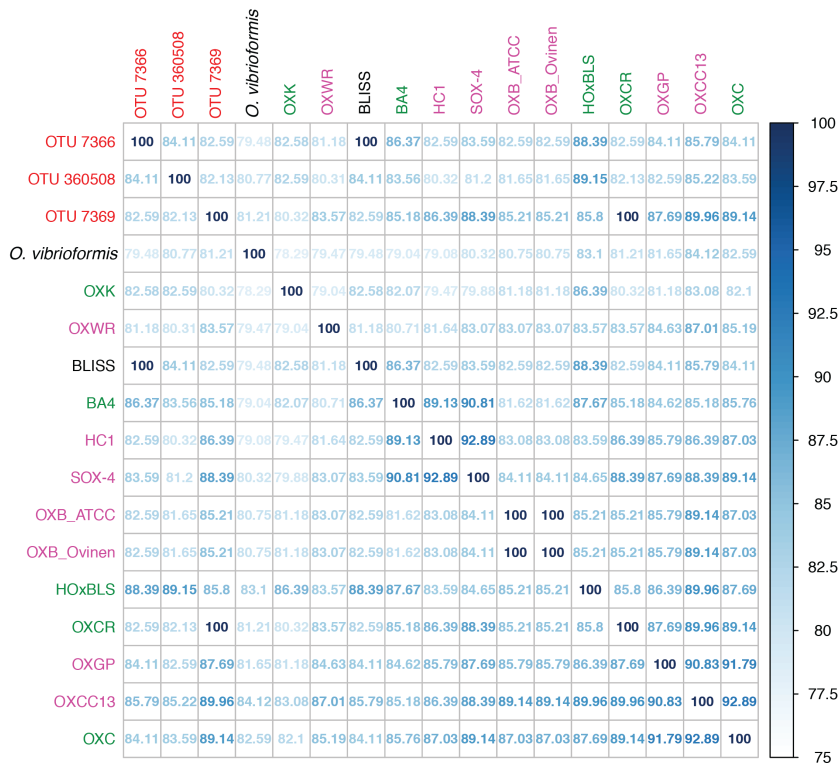

Supplement: 40168_2017_316_MOESM2_ESM.pdf [file 40168_2017_316_MOESM2_ESM.pdf]
